# Supplementary material for: TP53 gene rs1042522 allele G decreases neuroblastoma risk: a two-centre case-control study
Source: PubMed Central journal article supplement — J Cancer. 2019 Jan 1;10(2):467–71. doi: 10.7150/jca.27482 (PMC6360307; doi:10.7150/jca.27482), 2019-01-01
Supplement: jcav10p0467s1.pdf [file jcav10p0467s1.pdf]

**Supplemental Table 1.** Frequency distribution of selected characteristics in neuroblastoma patients and cancer-free controls

| Variables              | Guangdong province |       |                  |       | <i>P</i> <sup>a</sup> | Henan province |       |                  |       | <i>P</i> <sup>a</sup> |
|------------------------|--------------------|-------|------------------|-------|-----------------------|----------------|-------|------------------|-------|-----------------------|
|                        | Cases (n=256)      |       | Controls (n=531) |       |                       | Cases (n=118)  |       | Controls (n=281) |       |                       |
|                        | No.                | %     | No.              | %     |                       | No.            | %     | No.              | %     |                       |
| Age range, month       | 0-156              |       | 0.07-156         |       | 0.239                 | 0-131.1        |       | 0.1-144.0        |       | 0.189                 |
| Mean ± SD              | 30.87 ± 26.45      |       | 29.73 ± 24.86    |       |                       | 46.24 ± 29.98  |       | 44.97 ± 33.23    |       |                       |
| ≤18                    | 101                | 39.45 | 233              | 43.88 |                       | 23             | 19.49 | 72               | 25.62 |                       |
| >18                    | 155                | 60.55 | 298              | 56.12 |                       | 95             | 80.51 | 209              | 74.38 |                       |
| Gender                 |                    |       |                  |       | 0.333                 |                |       |                  |       | 0.196                 |
| Female                 | 103                | 40.23 | 233              | 43.88 |                       | 54             | 45.76 | 109              | 38.79 |                       |
| Male                   | 153                | 59.77 | 298              | 56.12 |                       | 64             | 54.24 | 172              | 61.21 |                       |
| Clinical stages        |                    |       |                  |       |                       |                |       |                  |       |                       |
| I                      | 54                 | 21.09 |                  |       |                       | 15             | 12.71 |                  |       |                       |
| II                     | 65                 | 25.39 |                  |       |                       | 31             | 26.27 |                  |       |                       |
| III                    | 44                 | 17.19 |                  |       |                       | 19             | 16.10 |                  |       |                       |
| IV                     | 77                 | 30.08 |                  |       |                       | 49             | 41.53 |                  |       |                       |
| 4s                     | 9                  | 3.52  |                  |       |                       | 3              | 2.54  |                  |       |                       |
| NA                     | 7                  | 2.73  |                  |       |                       | 1              | 0.85  |                  |       |                       |
| Sites of origin        |                    |       |                  |       |                       |                |       |                  |       |                       |
| Adrenal gland          | 46                 | 17.97 |                  |       |                       | 89             | 75.42 |                  |       |                       |
| Retroperitoneal region | 87                 | 33.98 |                  |       |                       | /              | /     |                  |       |                       |
| Mediastinum            | 90                 | 35.16 |                  |       |                       | 19             | 16.10 |                  |       |                       |
| Other region           | 25                 | 9.77  |                  |       |                       | 10             | 8.47  |                  |       |                       |
| NA                     | 8                  | 3.13  |                  |       |                       | /              | /     |                  |       |                       |

SD, standard deviation; NA, not available.

<sup>a</sup> Two-sided  $\chi^2$  test for distributions between neuroblastoma patients and cancer-free controls.
